# Supplementary material for: Isolation, Structure Elucidation, and First Total Synthesis of Quinomycins K and L, Two New Octadepsipeptides from the Maowei Sea Mangrove-Derived Streptomyces sp. B475
Source: MDPI journal article supplement (doi:10.3390/md21030143), 2023-02-23
Supplement: s1 [file s1]

## Supporting Information

### Isolation, Structure Elucidation, and First Total Synthesis of Quinomycins K and L, Two New Octadepsipeptides from the Maowei Sea Mangrove-derived *Streptomyces* sp. B475

**Qin-Pei Lu**<sup>1,2,†</sup>, **Gang Wu**<sup>2,†</sup>, **Xiao-Meng Hao**<sup>2</sup>, **Xin-Xin Hu**<sup>3,4</sup>, **Hao Cai**<sup>5</sup>, **Xiu-Jun Liu**<sup>5</sup>, **Xue-Fu You**<sup>3,4</sup>, **Hong-Wei Guo**<sup>1,\*</sup>, and **Cheng-Hang Sun**<sup>2,3,6,\*</sup>

<sup>1</sup> Guangxi Key Laboratory for Bioactive Molecules Research and Evaluation, Pharmaceutical College, Guangxi Medical University, Nanning 530021, China.

<sup>2</sup> Department of Microbial Chemistry, Institute of Medicinal Biotechnology, Chinese Academy of Medical Sciences & Peking Union Medical College, Beijing 100050, China.

<sup>3</sup> Beijing Key Laboratory of Antimicrobial Agents, Institute of Medicinal Biotechnology, Chinese Academy of Medical Sciences & Peking Union Medical College, Beijing 100050, China.

<sup>4</sup> Department of Pharmacology, Institute of Medicinal Biotechnology, Chinese Academy of Medical Sciences & Peking Union Medical College, Beijing 100050, China.

<sup>5</sup> Department of Oncology, Institute of Medicinal Biotechnology, Chinese Academy of Medical Sciences & Peking Union Medical College, Beijing 100050, China.

<sup>6</sup> College of Eco-Environmental Engineering, Qinghai University, Xining 810016, China.

\* Correspondence: hongweiguog@xmu.edu.cn (H.-W.G.); chenghangsun@hotmail.com or sunchenghang@imb.pumc.edu.cn (C.-H.S.); Tel.: +86-10-63165272

## Contents

- Figure S1. The HRESIMS of compound **1**.
- Figure S2. The UV spectrum of compound **1**.
- Figure S3. The IR spectrum of compound **1**.
- Figure S4. The ECD spectrum of compound **1**.
- Figure S5. The  $^1\text{H}$  NMR (600 MHz) spectrum of compound **1** in  $\text{DMSO-}d_6$ .
- Figure S6. The  $^{13}\text{C}$  NMR (150 MHz) spectrum of compound **1** in  $\text{DMSO-}d_6$ .
- Figure S7. The  $^1\text{H}$ - $^1\text{H}$  COSY spectrum of compound **1**.
- Figure S8. The HSQC spectrum of compound **1**.
- Figure S9. The HMBC spectrum of compound **1**.
- Figure S10. The ROESY spectrum of compound **1**.
- Figure S11. The Extracted Ion Chromatogram (EIC) of L-FDLA and D-FDLA derivatives of amino acid standards.
- Figure S12. The HRESIMS of compound **2**.
- Figure S13. The UV spectrum of compound **2**.
- Figure S14. The IR spectrum of compound **2**.
- Figure S15. The ECD spectrum of compound **2**.
- Figure S16. The  $^1\text{H}$  NMR (600 MHz) spectrum of compound **2** in  $\text{DMSO-}d_6$ .
- Figure S17. The  $^{13}\text{C}$  NMR (150 MHz) spectrum of compound **2** in  $\text{DMSO-}d_6$ .
- Figure S18. The  $^1\text{H}$ - $^1\text{H}$  COSY spectrum of compound **2**.
- Figure S19. The HSQC spectrum of compound **2**.
- Figure S20. The HMBC spectrum of compound **2**.
- Figure S21. The HRESIMS of synthetic-**1**.
- Figure S22. The UV spectrum of synthetic-**1**.
- Figure S23. The IR spectrum of synthetic-**1**.
- Figure S24. The  $^1\text{H}$  NMR (600 MHz) spectrum of synthetic-**1** in  $\text{DMSO-}d_6$ .
- Figure S25.1 The  $^{13}\text{C}$  NMR (150 MHz) spectrum of synthetic-**1** in  $\text{DMSO-}d_6$ .
- Figure S26. The HRESIMS of synthetic-**2**.
- Figure S27. The UV spectrum of synthetic-**2**.
- Figure S28.2 The IR spectrum of synthetic-**2**.
- Figure S29.3 The  $^1\text{H}$  NMR (600 MHz) spectrum of synthetic-**2** in  $\text{DMSO-}d_6$ .
- Figure S30. The  $^{13}\text{C}$  NMR (150 MHz) spectrum of synthetic-**2** in  $\text{DMSO-}d_6$ .
- Figure S31. Comparison of  $^1\text{H}$  NMR spectra (600 MHz) of natural and synthetic of **1**.
- Figure S32. Comparison of  $^{13}\text{C}$  NMR spectra (150 MHz) of natural and synthetic of **1**.
- Figure S33. Comparison of  $^1\text{H}$  NMR spectra (600 MHz) of natural and synthetic of **2**.
- Figure S34. Comparison of  $^{13}\text{C}$  NMR spectra (125 MHz) of natural and synthetic of **2**.
- Figure S35. The UPLC-UV-MS chromatograms of **1** (natural, synthetic, and co-elution) in the condition of ACN/water with 0.1% formic acid.
- Figure S36. The UPLC-UV-MS chromatograms of **1** (natural, synthetic, and co-elution) in the condition of MeOH/water with 0.1% formic acid.
- Figure S37. The UPLC-UV-MS chromatograms of **2** (natural, synthetic, and co-elution) in the condition of ACN/ water with 0.1% formic acid.
- Figure S38. The UPLC-UV-MS chromatograms of **2** (natural, synthetic, and co-elution) in the condition of MeOH/ water with 0.1% formic acid.

Table S1. The physicochemical properties of natural-1, synthetic-1, natural-2, and synthetic-2.

Table S2. The antibacterial activities of synthetic-1 and synthetic-2 (MIC,  $\mu\text{g/mL}$ ).

Table S3. The cytotoxic activity of synthetic-1 and synthetic-2 against H460 lung cancer cells.

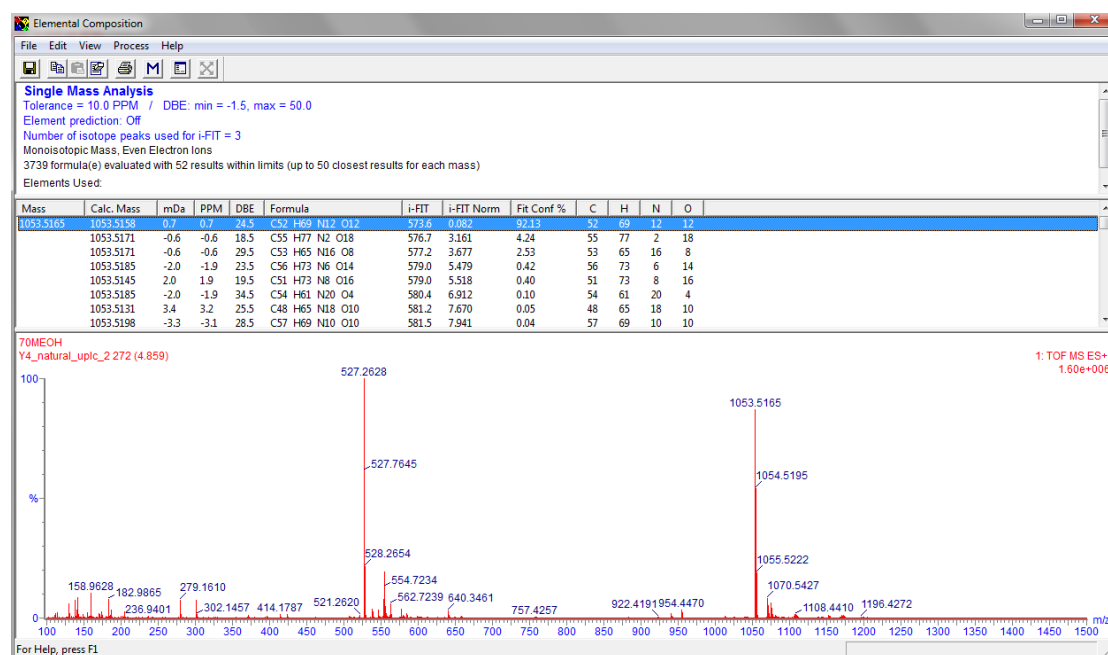

Figure S1. The HRESIMS of compound 1.

# 光谱峰值检测报告

2020-11-11 11:55:06

数据集: Y4\_2 - RawData

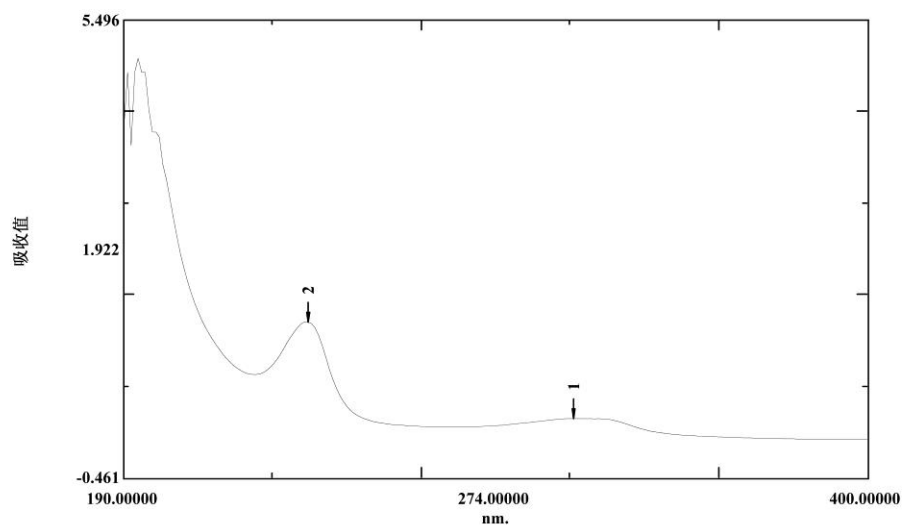

测定属性  
 波长范围 (nm.): 190.00000 到 400.00000  
 扫描速度: 中速  
 采样间隔: 1.0  
 自动采样间隔: 停用  
 扫描模式: 自动

| No. | P/V | 波长(nm)    | 吸收值   |
|-----|-----|-----------|-------|
| 1   | ①   | 317.00000 | 0.307 |
| 2   | ①   | 242.00000 | 1.566 |
| 3   | ②   | 284.00000 | 0.195 |
| 4   | ②   | 227.00000 | 0.880 |

仪器属性  
 仪器类型: UV-2500PC 系列  
 测定方式: 吸收值  
 狭缝宽: 2.0 nm  
 光源转换波长: 350.0 nm  
 S/R 转换: 标准

附件属性  
 附件: 6联池  
 池数目: 1

样品准备属性  
 重量: 0.03MG  
 体积: 1.5ML  
 稀释:  
 光程长: 10  
 附加信息: mg/ml

Figure S2. The UV spectrum of compound **1**.

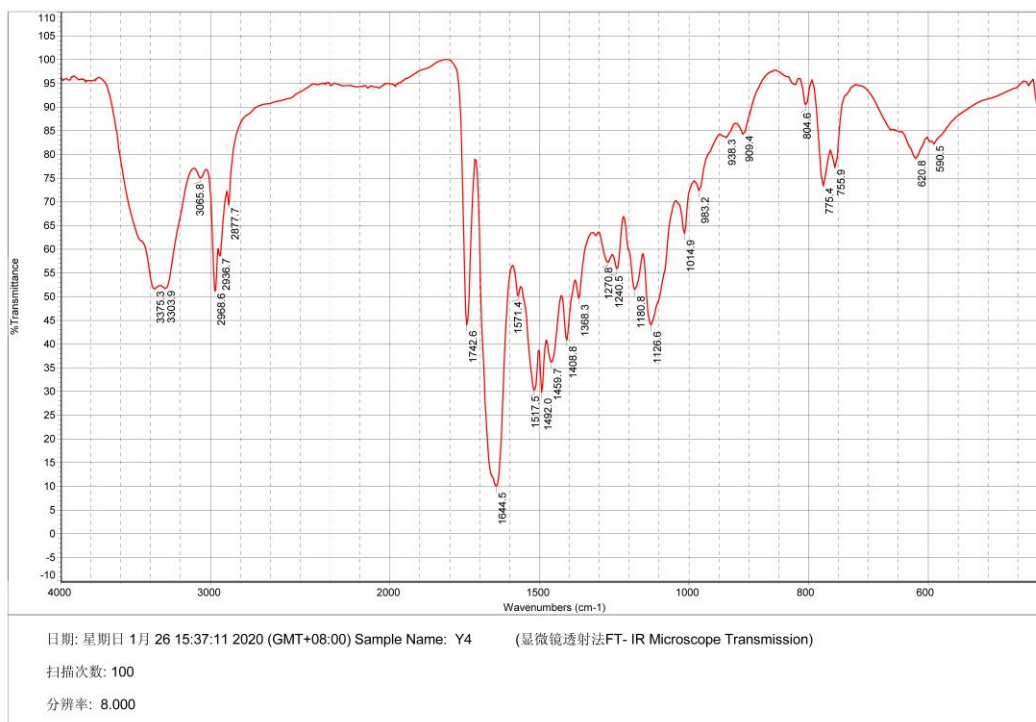

Figure S3. The IR spectrum of compound **1**.

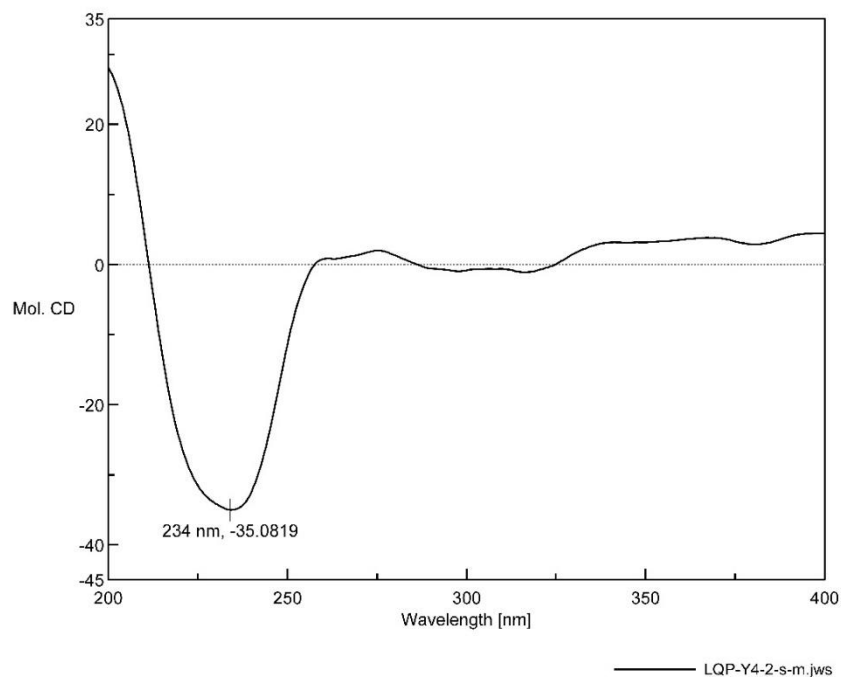

[Measurement Information]  
Instrument Name J-815  
Model Name J-815  
Serial No. A024461168  
  
Accessory Standard  
Accessory S/N A024461168  
Cell Length 1 mm  
  
Measurement date 2020/11/11 15:28  
  
Photometric Mode CD, HT, Abs  
Measure Range 400 - 200 nm  
Data pitch 0.5 nm  
Sensitivity Standard  
D.I.T. 1 sec  
Bandwidth 1.00 nm  
Start Mode Immediately  
Scanning Speed 100 nm/min  
Baseline Correction Baseline  
Shutter Control Auto  
CD Detector PMT  
PMT Voltage Auto  
Accumulations 2  
Solvent MEOH  
Concentration 0.02 (w/v)%

Figure S4. The ECD spectrum of compound 1.

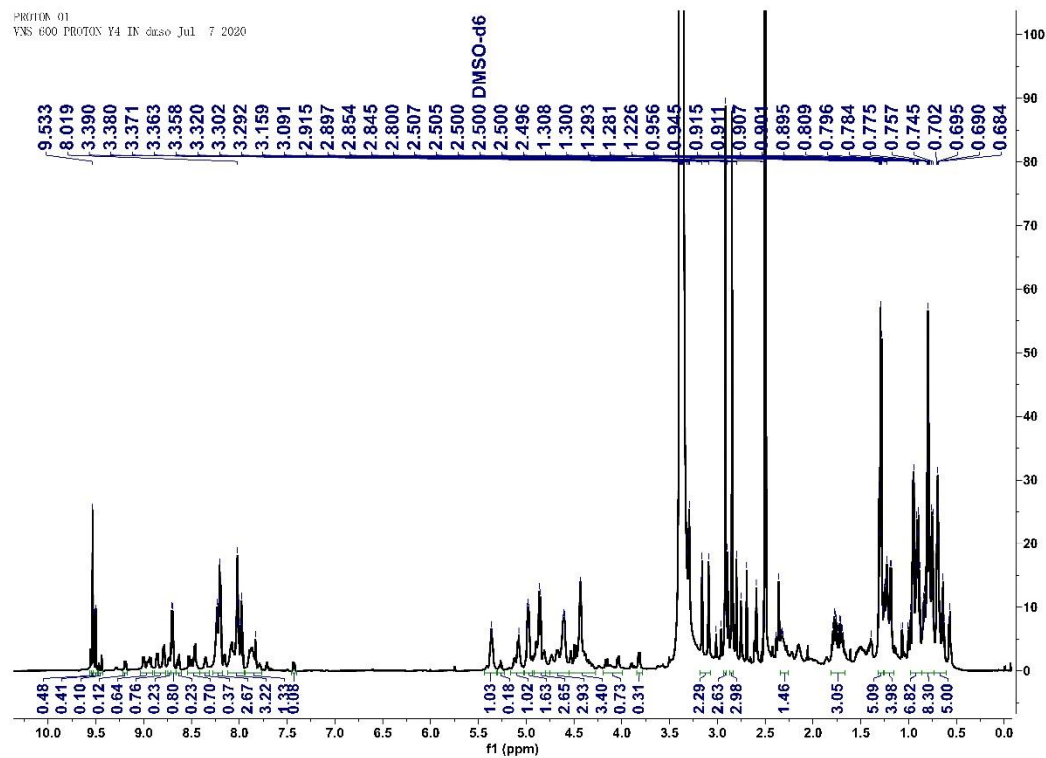

Figure S5. The  $^1\text{H}$  NMR (600 MHz) spectrum of compound **1** in  $\text{DMSO}-d_6$ .

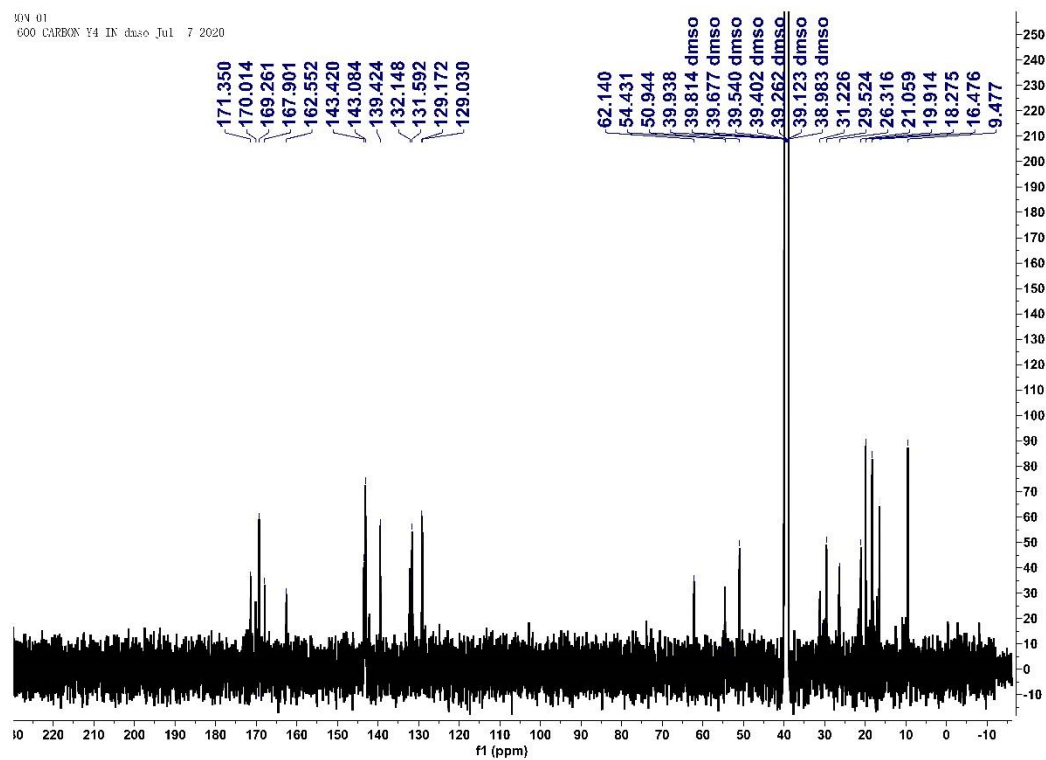

Figure S6. The  $^{13}\text{C}$  NMR (150 MHz) spectrum of compound **1** in  $\text{DMSO}-d_6$ .



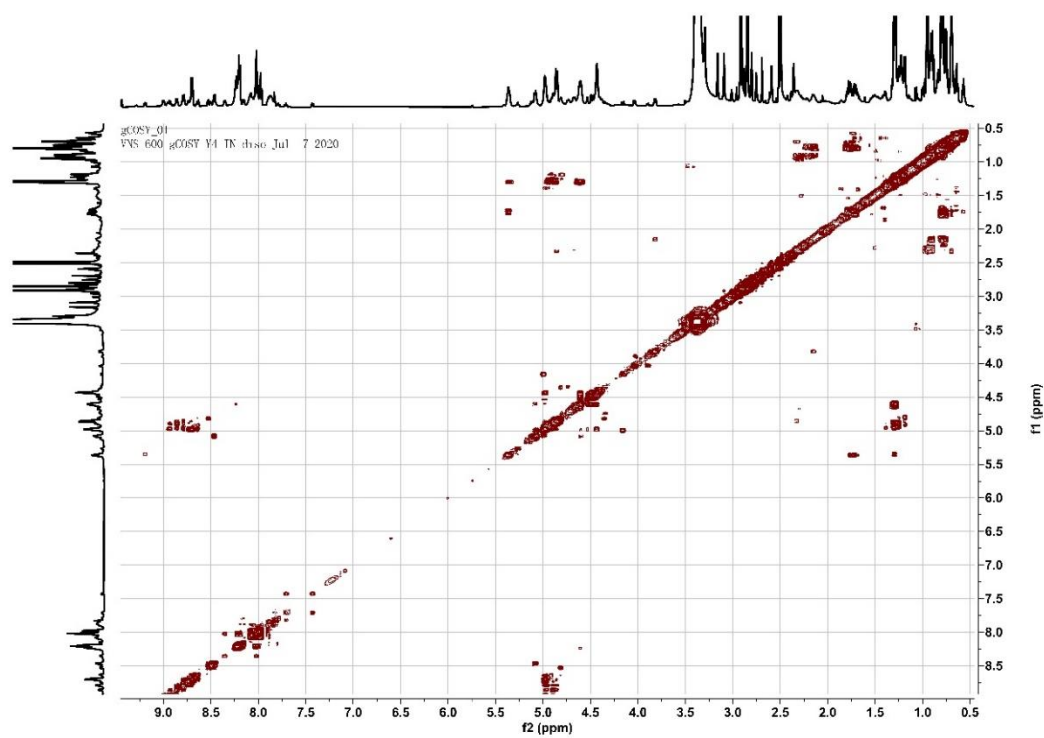

Figure S7. The  $^1\text{H}$ - $^1\text{H}$  COSY spectrum of compound **1**.

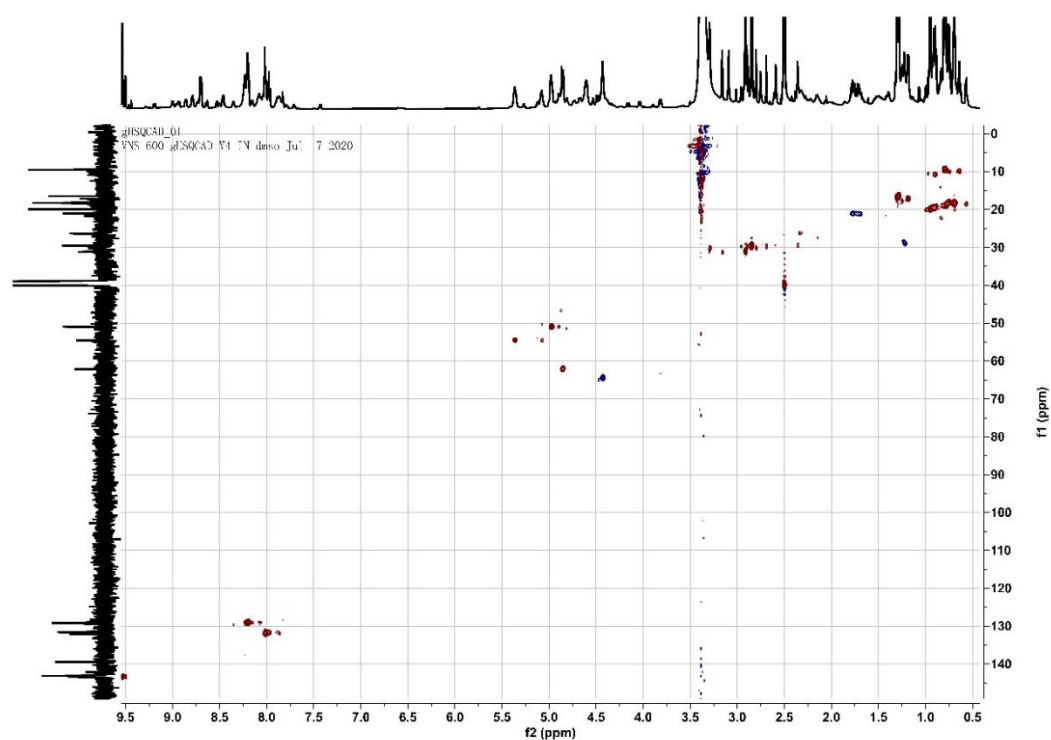

Figure S8. The HSQC spectrum of compound **1**.

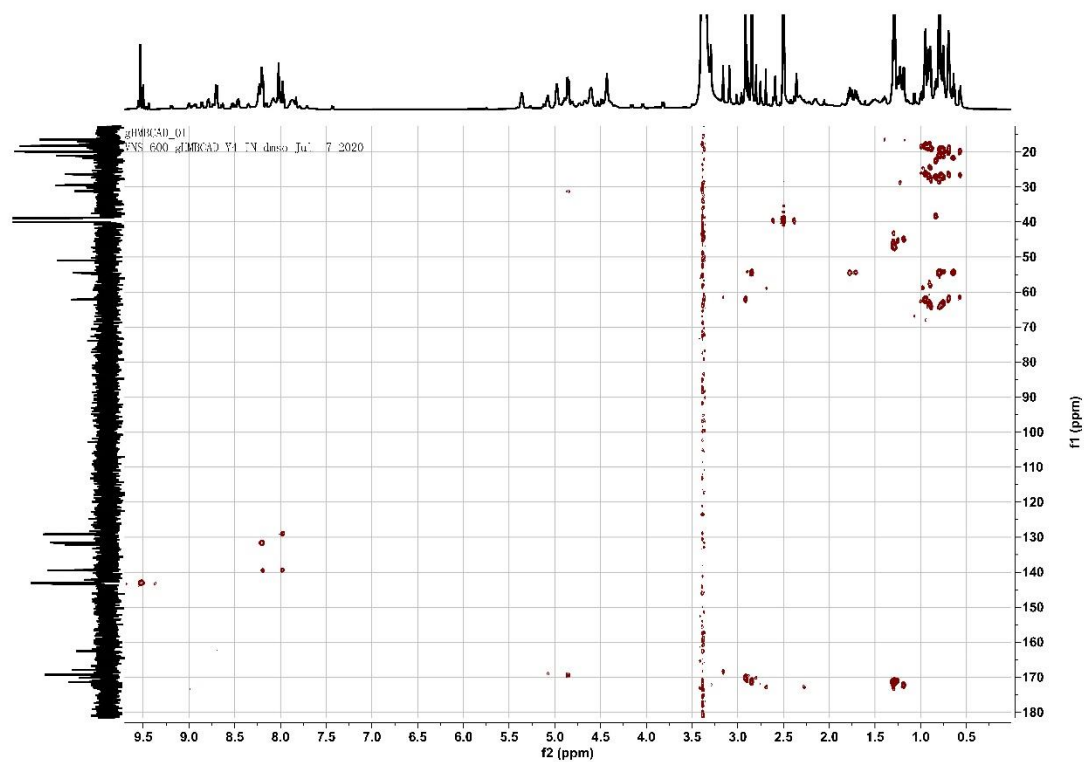

Figure S9. The HMBC spectrum of compound **1**.

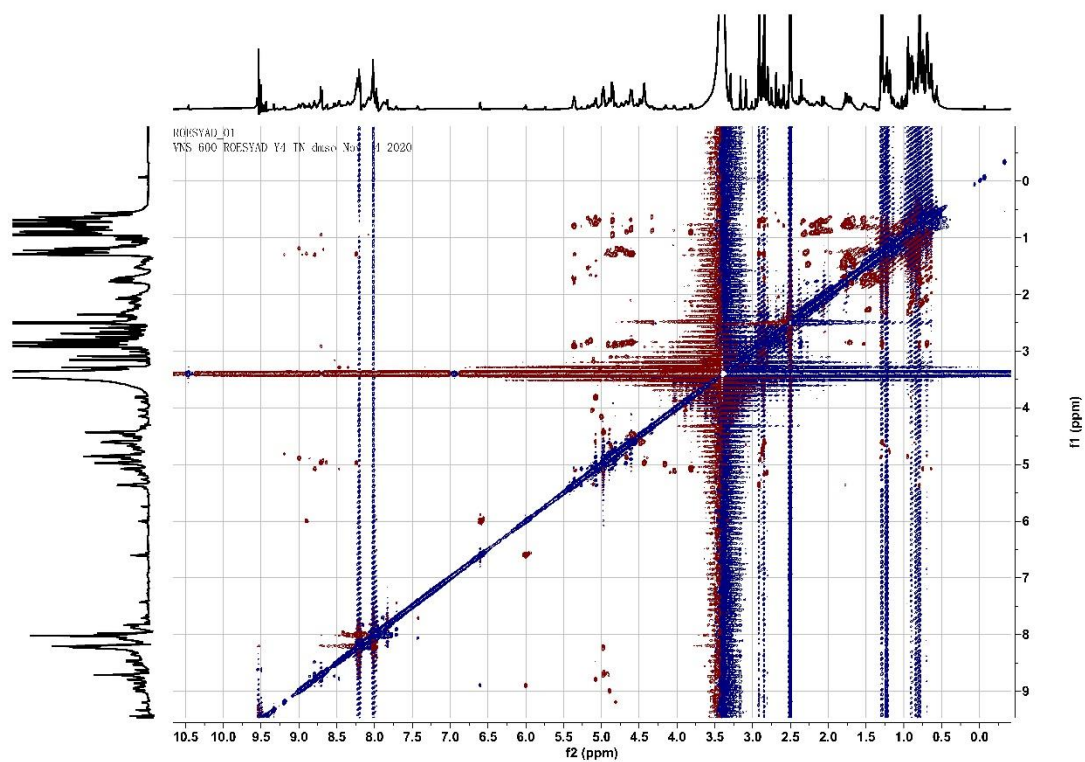

Figure S10. The ROESY spectrum of compound **1**.



光谱峰值检测报告

2012-06-13 00:04:39

数据集: Y7\_20210111 - RawData

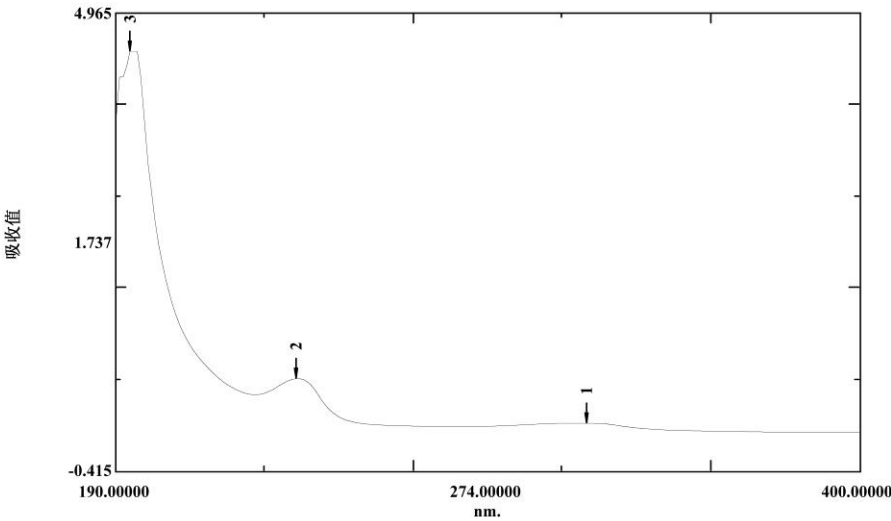

测定属性  
波长范围 (nm.): 190.00000 到 400.00000  
扫描速度: 中速  
采样间隔: 1.0  
自动采样间隔: 停用  
扫描模式: 自动

仪器属性  
仪器类型: UV-2500PC 系列  
测定方式: 吸收值  
狭缝宽: 2.0 nm  
光源转换波长: 350.0 nm  
S/R 转换: 标准

附件属性  
附件: 6联池  
池数目: 1

样品准备属性  
重量: 0.02  
体积: 1  
稀释:  
光程长: 10  
附加信息: 0.018mg/ml

| No. | P/V | 波长(nm)    | 吸收值   |
|-----|-----|-----------|-------|
| 1   | ①   | 323.00000 | 0.141 |
| 2   | ②   | 241.00000 | 0.666 |
| 3   | ③   | 194.00000 | 4.516 |
| 4   | ④   | 288.00000 | 0.100 |
| 5   | ⑤   | 229.00000 | 0.477 |

Figure S13. The UV spectrum of compound 2.

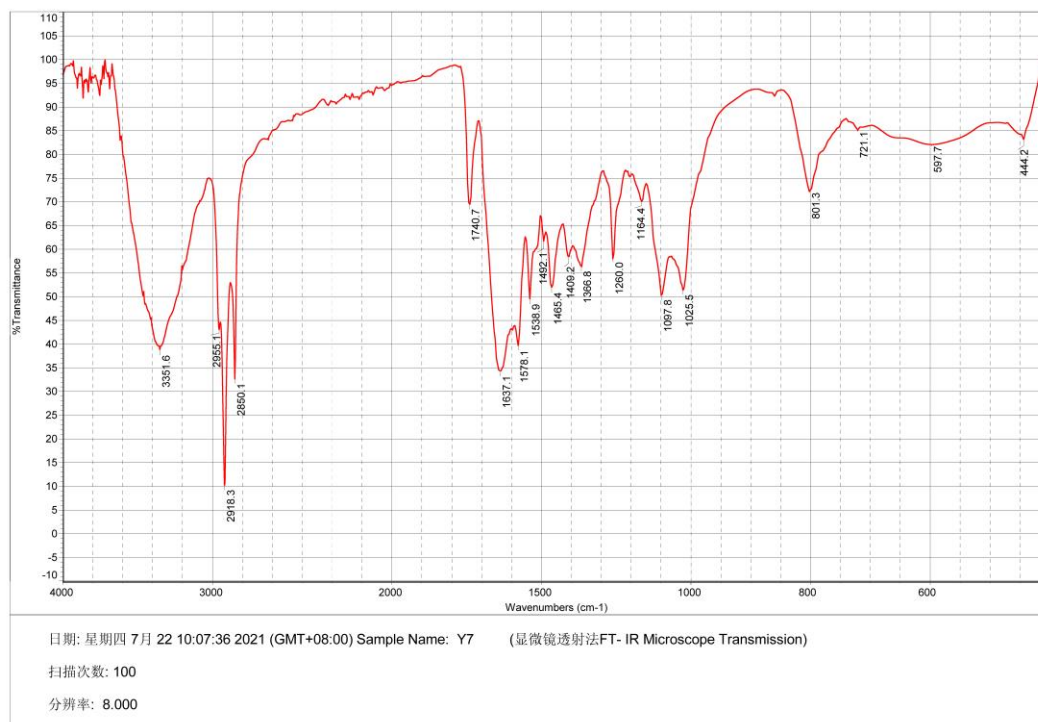

Figure S14. The IR spectrum of compound **2**.



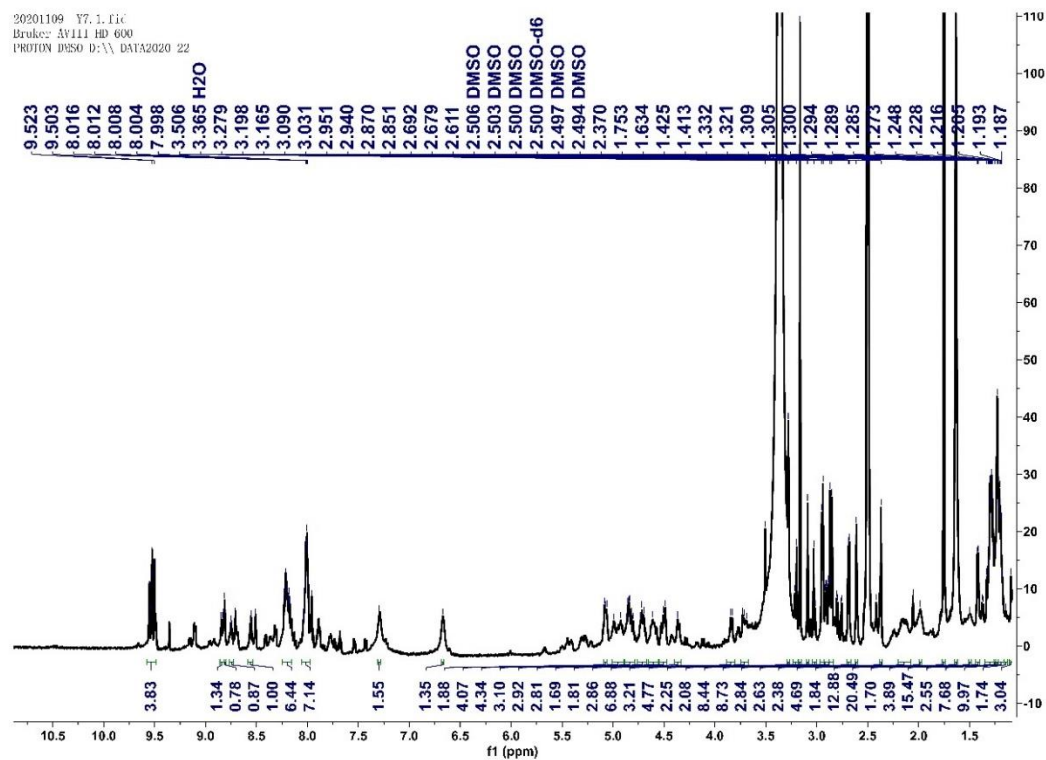

Figure S16. The <sup>1</sup>H NMR (600 MHz) spectrum of compound 2 in DMSO-*d*<sub>6</sub>.

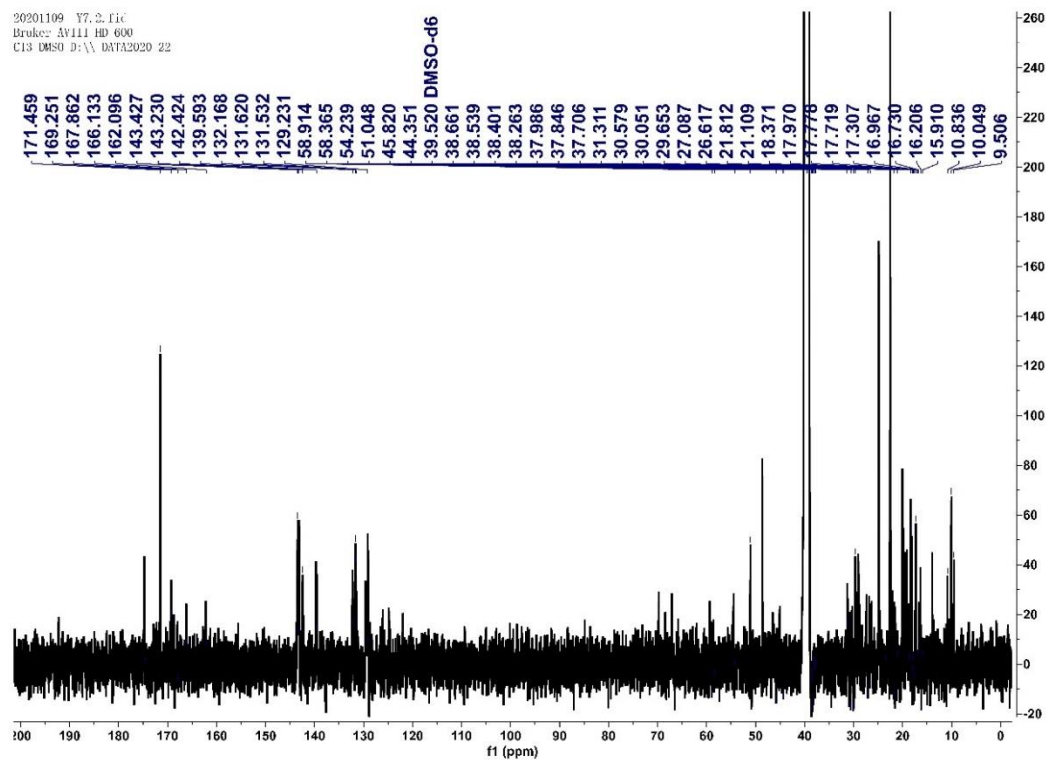

Figure S17. The <sup>13</sup>C NMR (150 MHz) spectrum of compound 2 in DMSO-*d*<sub>6</sub>.

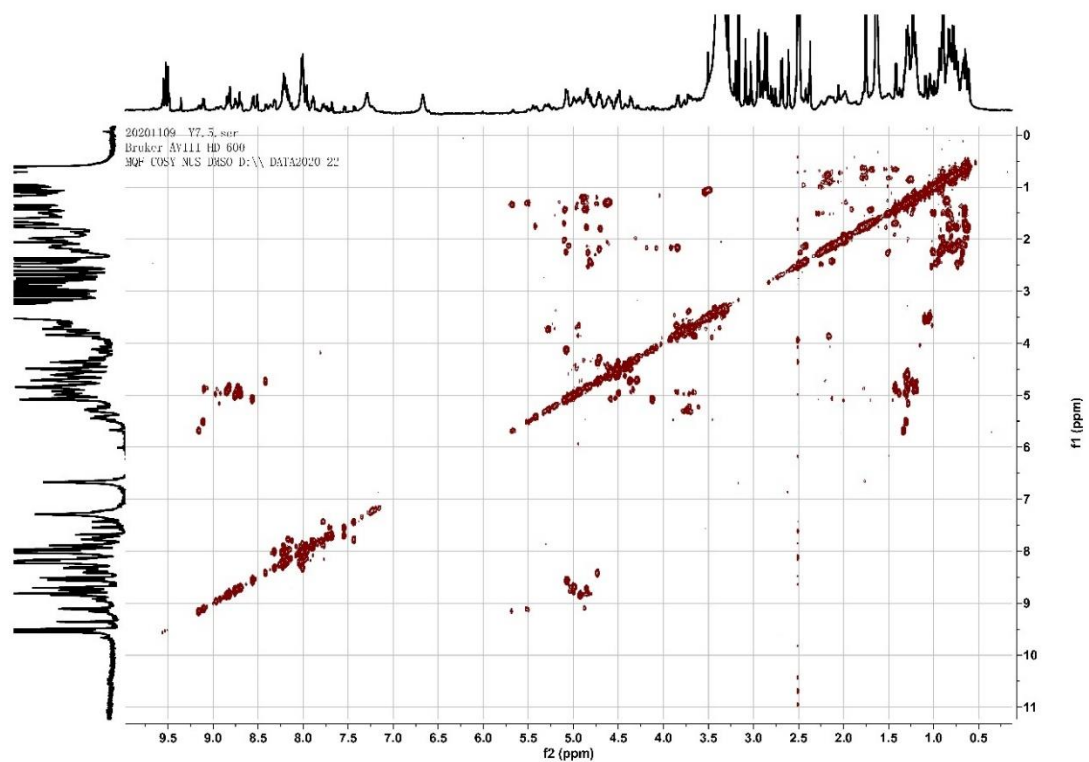

Figure S18. The  $^1\text{H}$ - $^1\text{H}$  COSY spectrum of compound **2**.

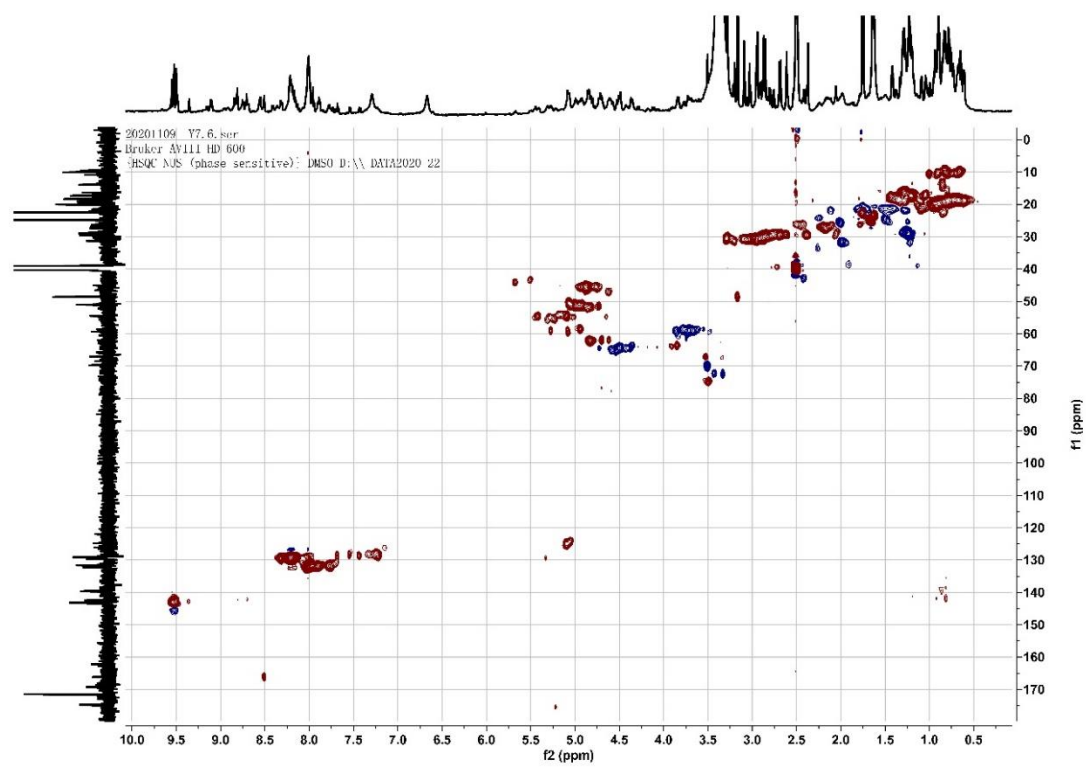

Figure S19. The HSQC spectrum of compound **2**.



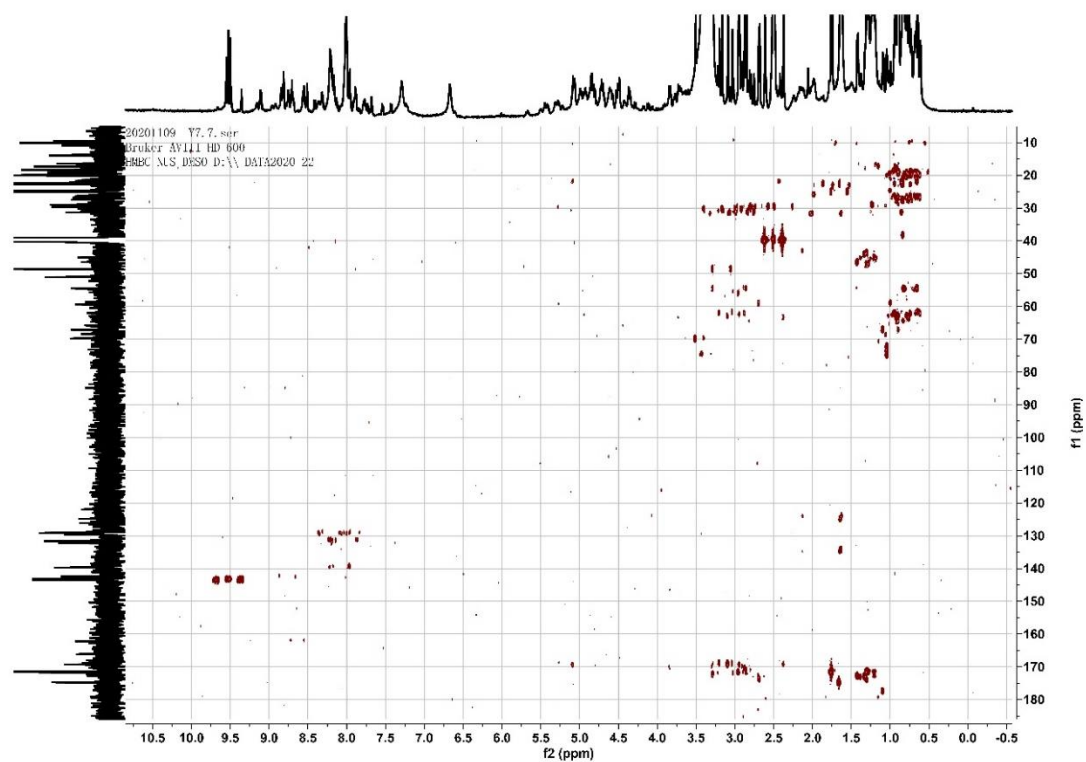

Figure S20. The HMBC spectrum of compound **2**.

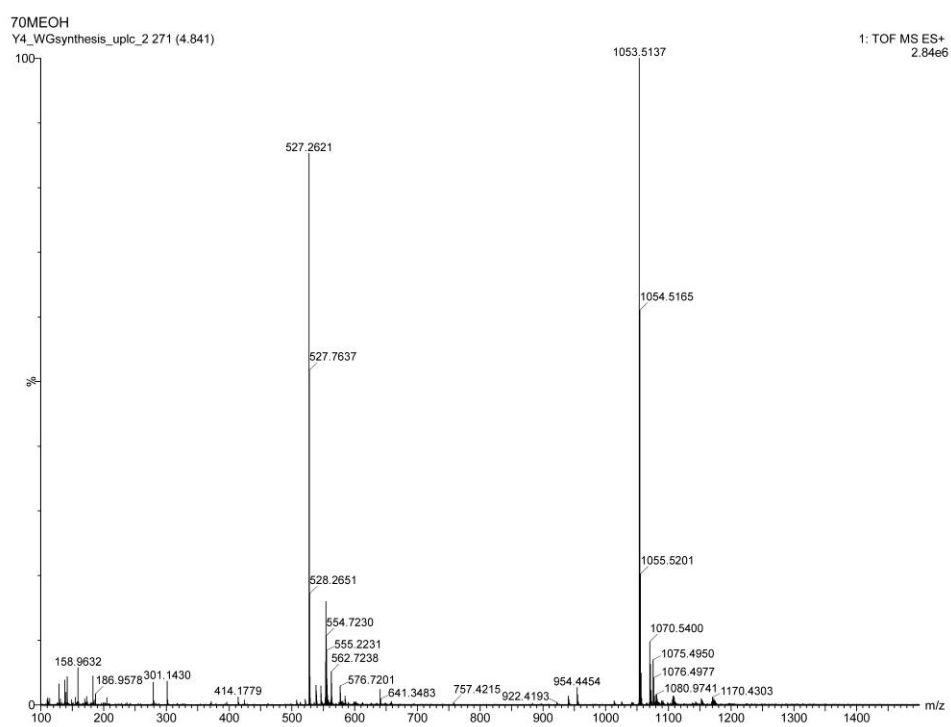

Figure S21. The HRESIMS of synthetic-**1**.

光谱峰值检测报告

2012-08-21 02:42:06

数据集: Y4s\_20210111 - RawData

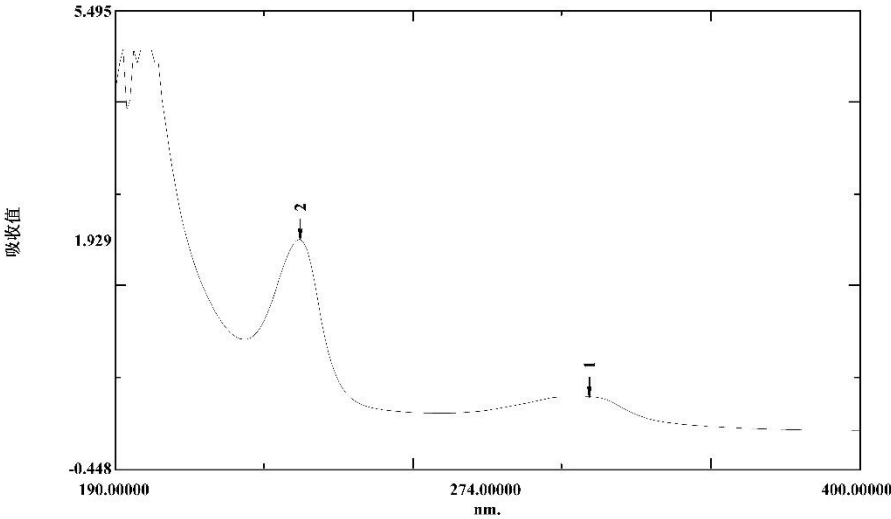

测定属性  
波长范围 (nm.): 190.00000 到 400.00000  
扫描速度: 中速  
采样间隔: 1.0  
自动采样间隔: 停用  
扫描模式: 自动

| No. | P/V | 波长(nm)    | 吸收值   |
|-----|-----|-----------|-------|
| 1   |     | 324.00000 | 0.484 |
| 2   |     | 242.00000 | 2.533 |
| 3   |     | 282.00000 | 0.269 |
| 4   |     | 226.00000 | 1.232 |

仪器属性  
仪器类型: UV-2500PC 系列  
测定方式: 吸收值  
狭缝宽: 2.0 nm  
光源转换波长: 350.0 nm  
S/R 转换: 标准

附件属性  
附件: 6联池  
池数: 1

样品准备属性  
重量: 0.02  
体积: 1  
稀释: 10  
光程长: 10  
附加信息: 0.04mg/mL

Figure S22. The UV spectrum of synthetic-1.

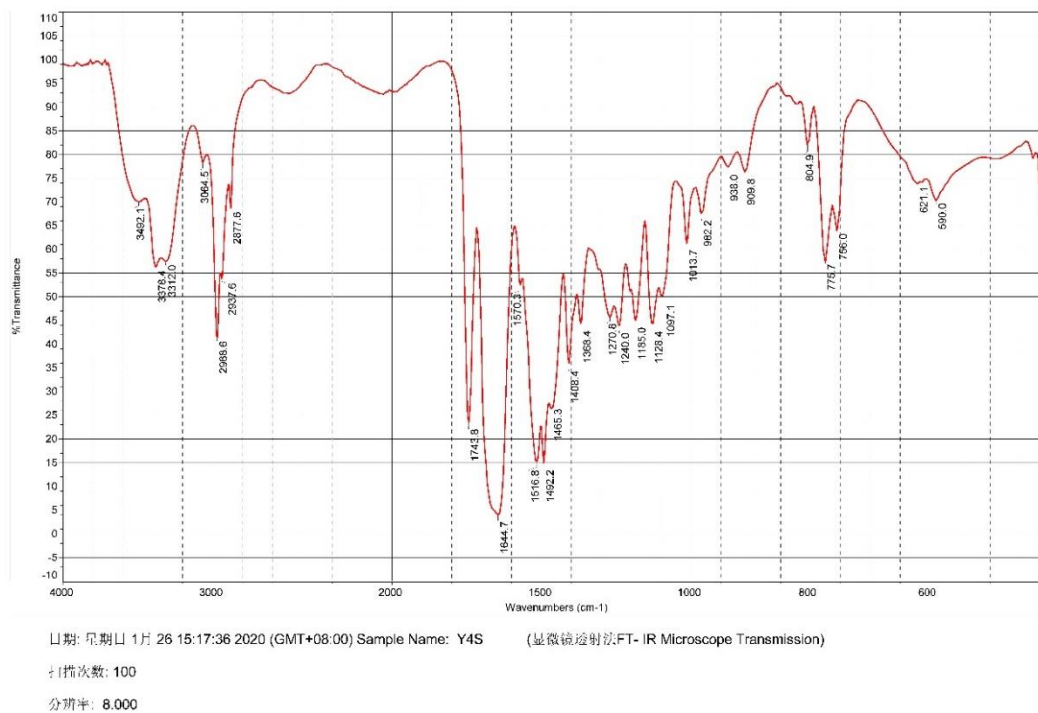

Figure S23. The IR spectrum of synthetic-1.

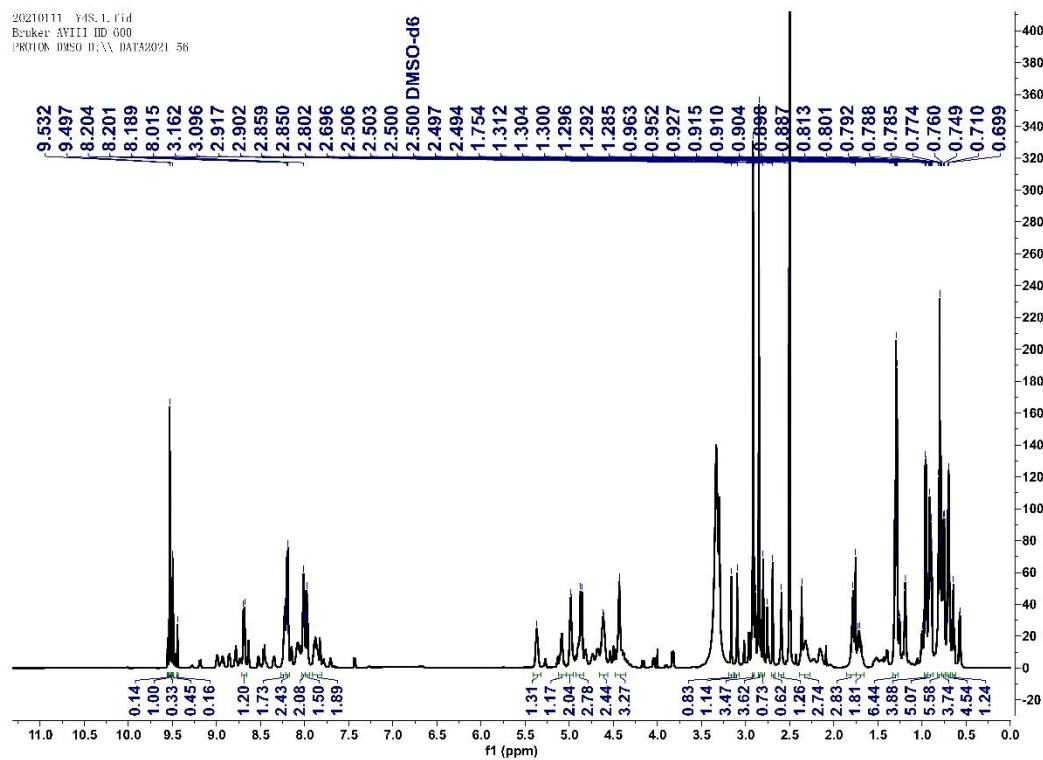

Figure S24. The <sup>1</sup>H NMR (600 MHz) spectrum of synthetic-1 in DMSO-*d*<sub>6</sub>.

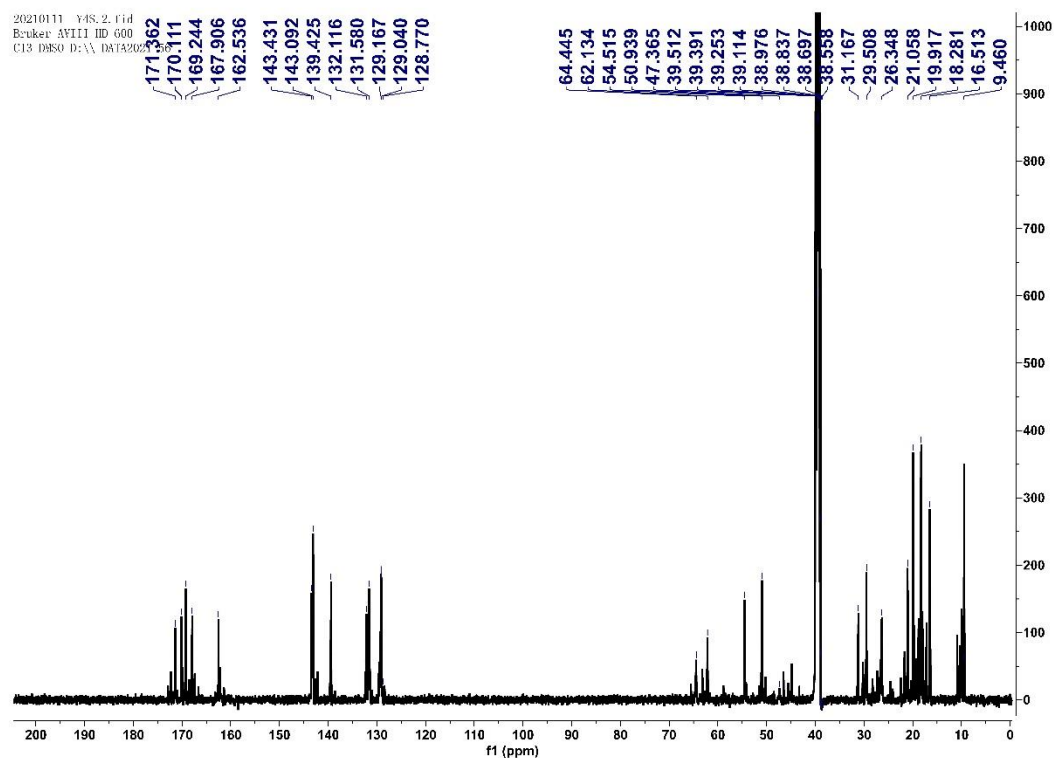

Figure S25.4 The  $^{13}\text{C}$  NMR (150 MHz) spectrum of synthetic-1 in  $\text{DMSO}-d_6$ .

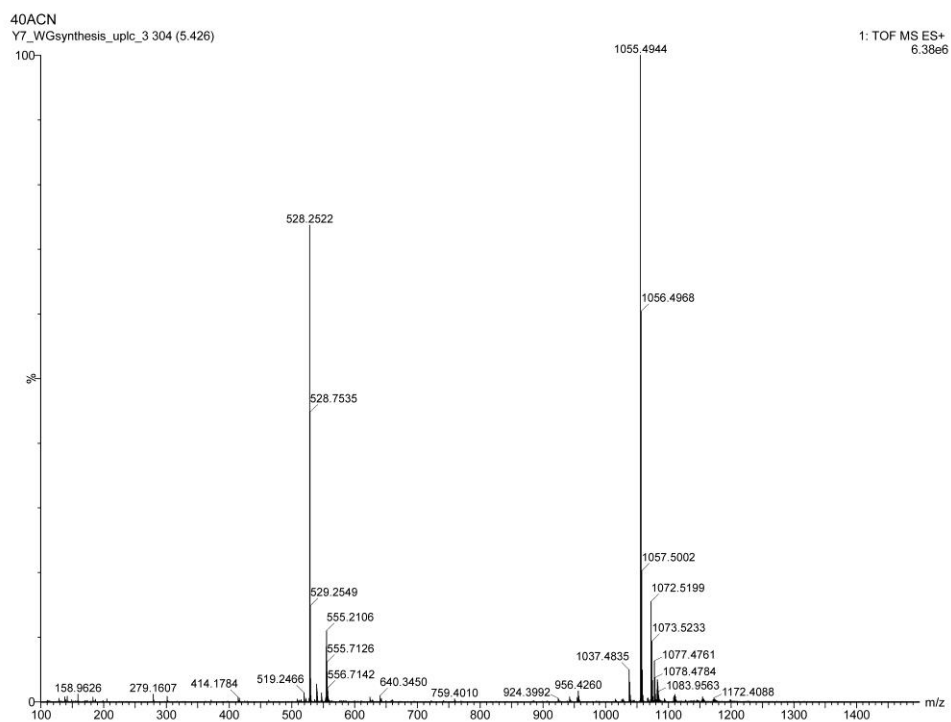

Figure S26. The HRESIMS of synthetic-2.

光谱峰值检测报告

2012-08-21 02:46:23

数据集: Y7S\_gaonongdu20210111 - RawData

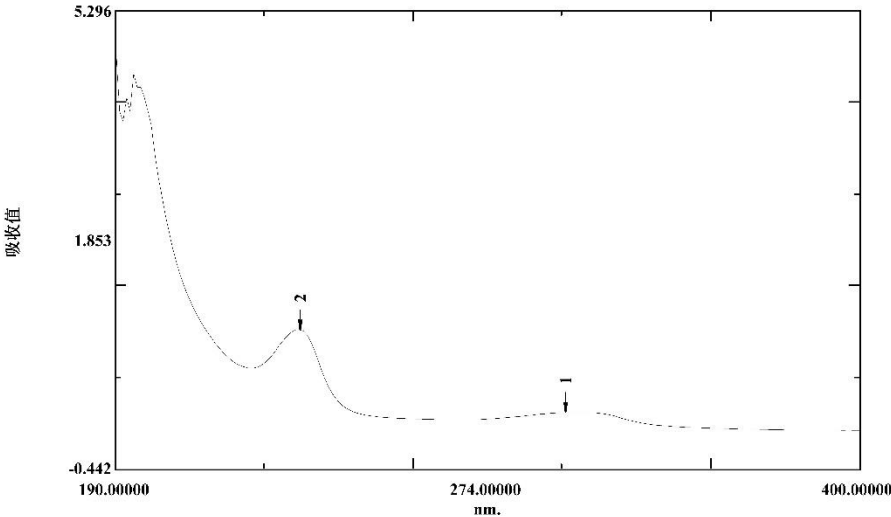

测定属性  
波长范围 (nm.): 190.00000 到 400.00000  
扫描速度: 中速  
采样间隔: 1.0  
自动采样间隔: 停用  
扫描模式: 自动

| No. | P/V | 波长(nm)    | 吸收值   |
|-----|-----|-----------|-------|
| 1   |     | 317.00000 | 0.258 |
| 2   |     | 242.00000 | 1.302 |
| 3   |     | 287.00000 | 0.169 |
| 4   |     | 228.00000 | 0.816 |

仪器属性  
仪器类型: UV-2500PC 系列  
测定方式: 吸收值  
狭缝宽: 2.0 nm  
光源转换波长: 350.0 nm  
S/R 转换: 标准

附件属性  
附件: 6联池  
池数日: 1

样品准备属性  
重量: 0.02  
体积: 1  
稀释:  
光程长: 10  
附加信息: 0.04mg/mL

Figure S27. The UV spectrum of synthetic-2.

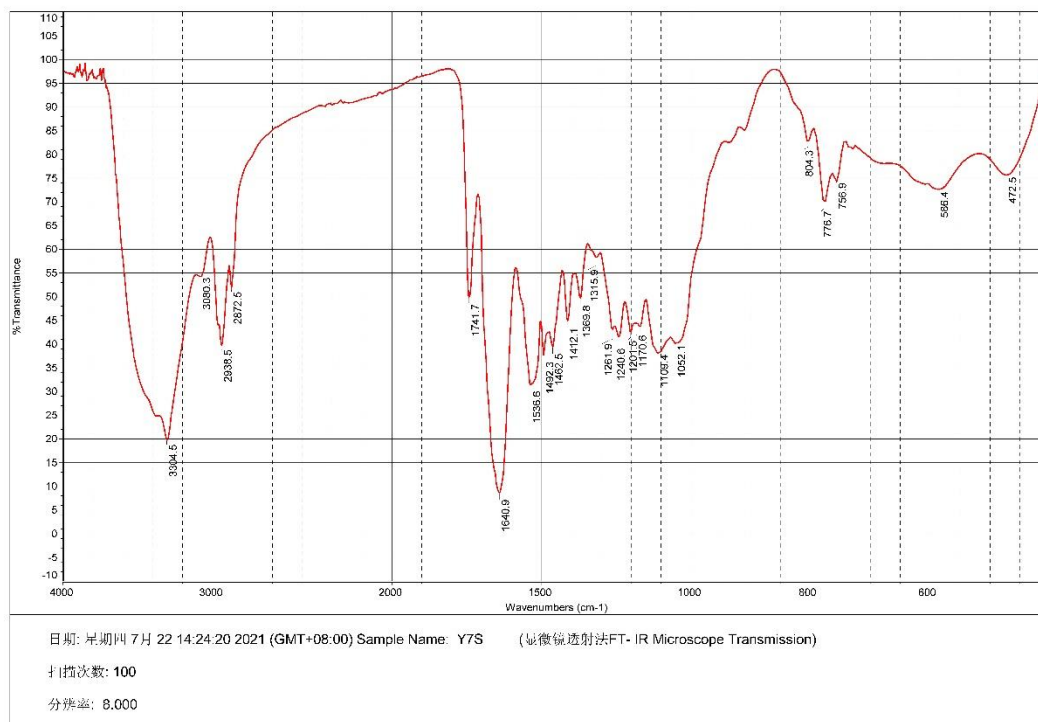

Figure S28.5 The IR spectrum of synthetic-2.

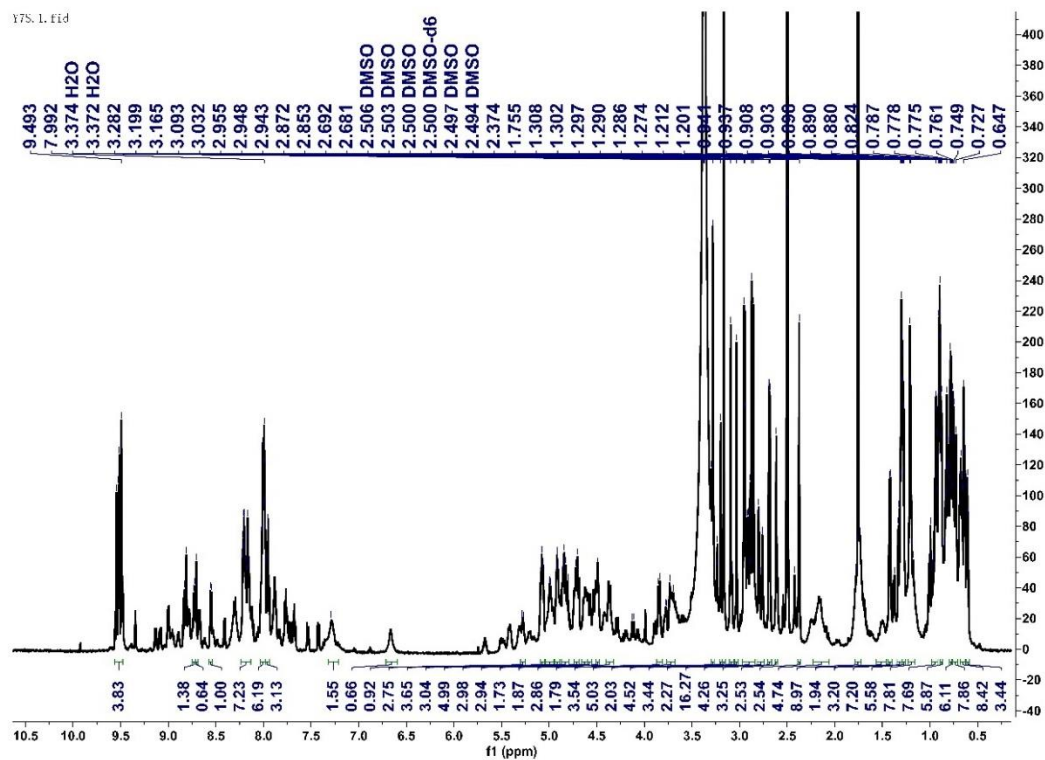

Figure S29.6 The <sup>1</sup>H NMR (600 MHz) spectrum of synthetic-2 in DMSO-*d*<sub>6</sub>.

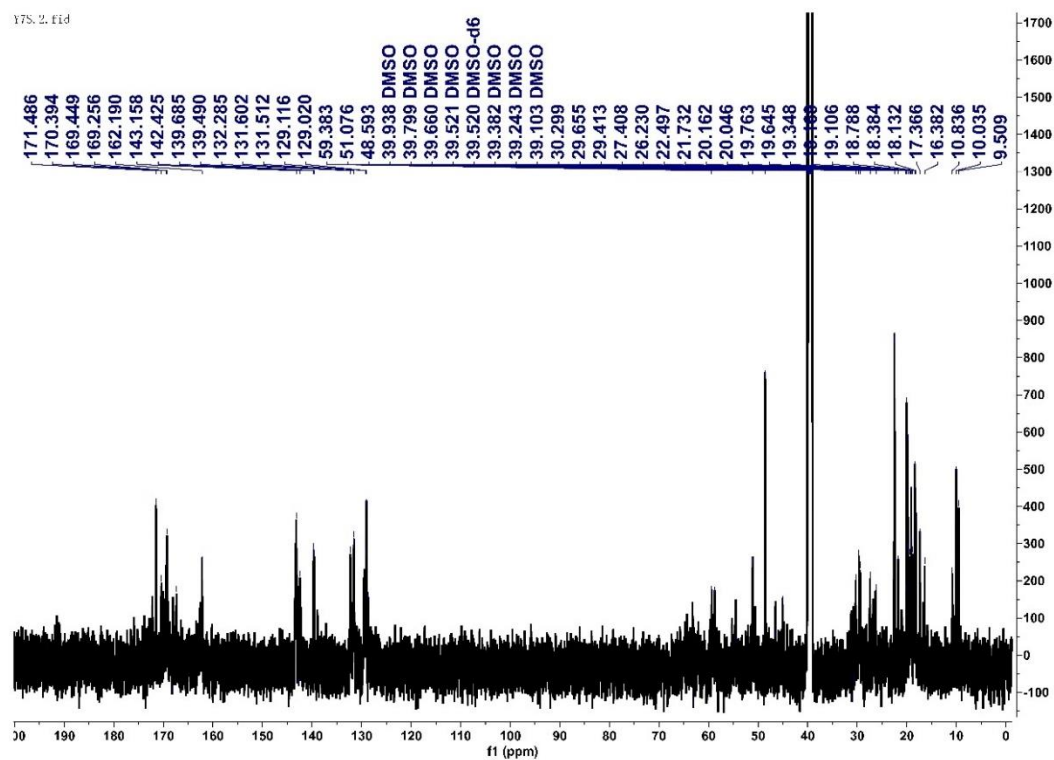

Figure S30. The  $^{13}\text{C}$  NMR (150 MHz) spectrum of synthetic-2 in  $\text{DMSO-}d_6$ .

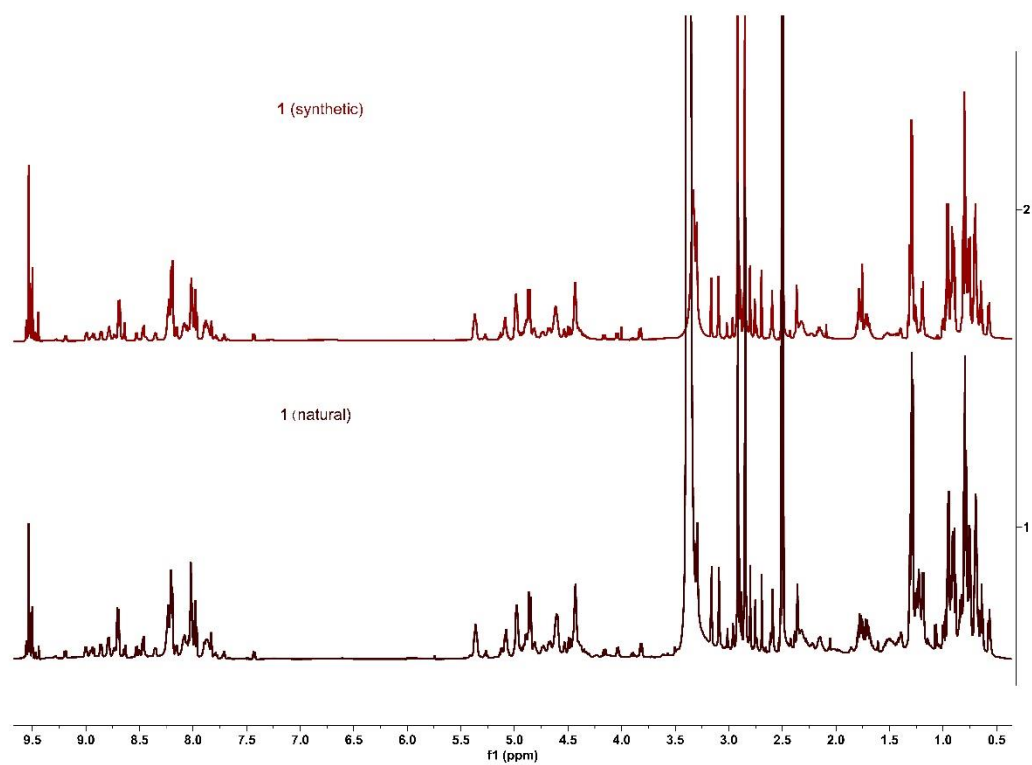

Figure S31. Comparison of  $^1\text{H}$  NMR spectra (600 MHz) of natural and synthetic of 1.

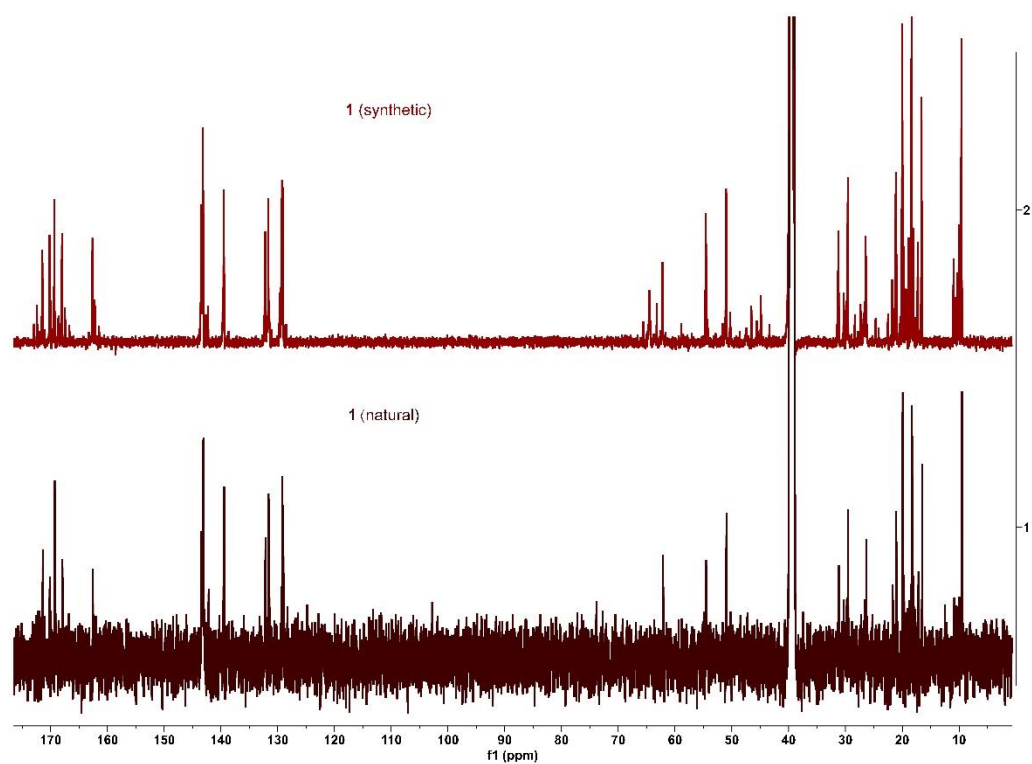

Figure S32. Comparison of  $^{13}\text{C}$  NMR spectra (150 MHz) of natural and synthetic of 1.

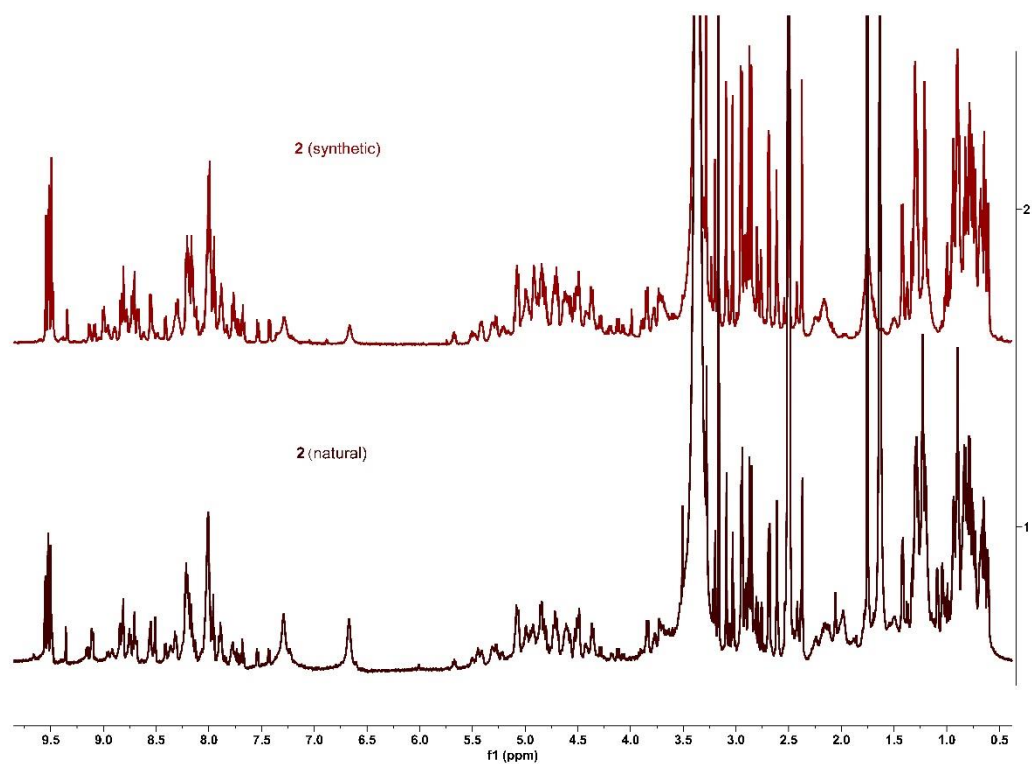

Figure S33. Comparison of  $^1\text{H}$  NMR spectra (600 MHz) of natural and synthetic of 2.



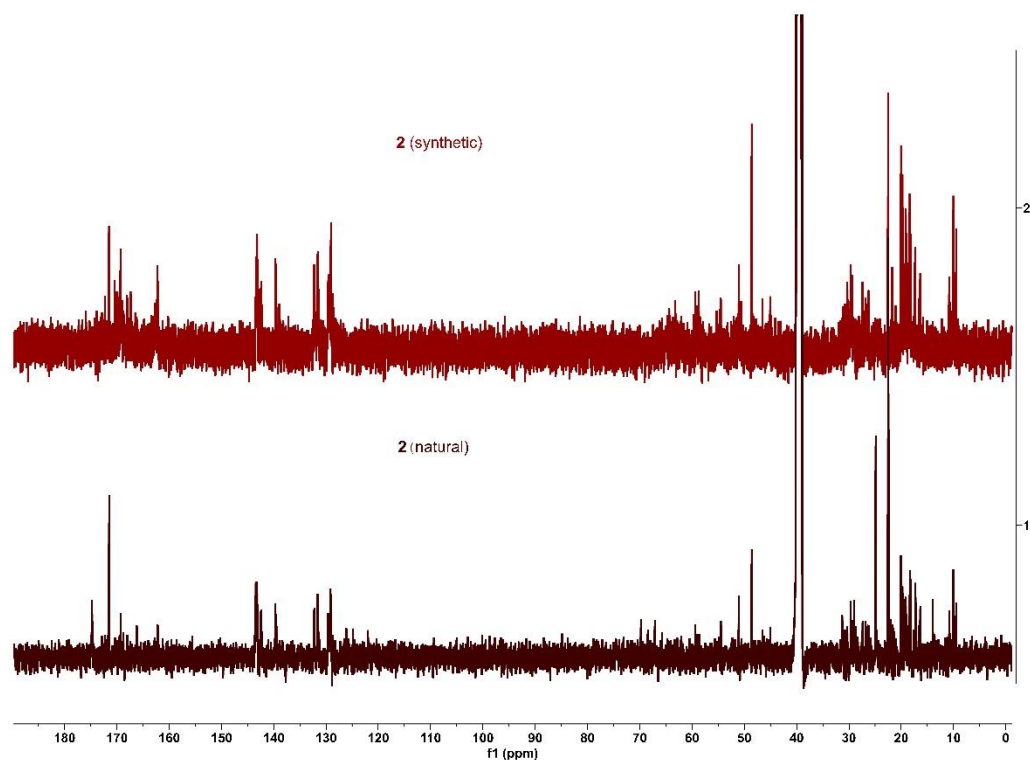

Figure S34. Comparison of  $^{13}\text{C}$  NMR spectra (125 MHz) of natural and synthetic of **2**.

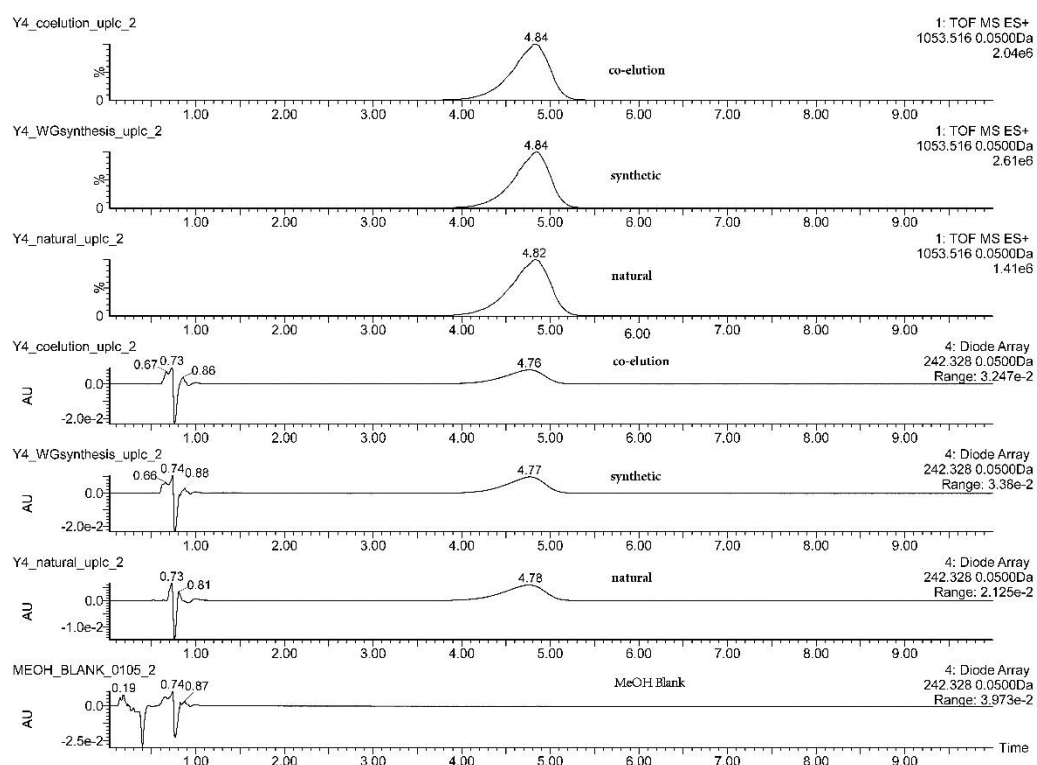

Figure S35. The UPLC-UV-MS chromatograms of **1** (natural, synthetic, and co-elution) in the condition of ACN/water with 0.1% formic acid.

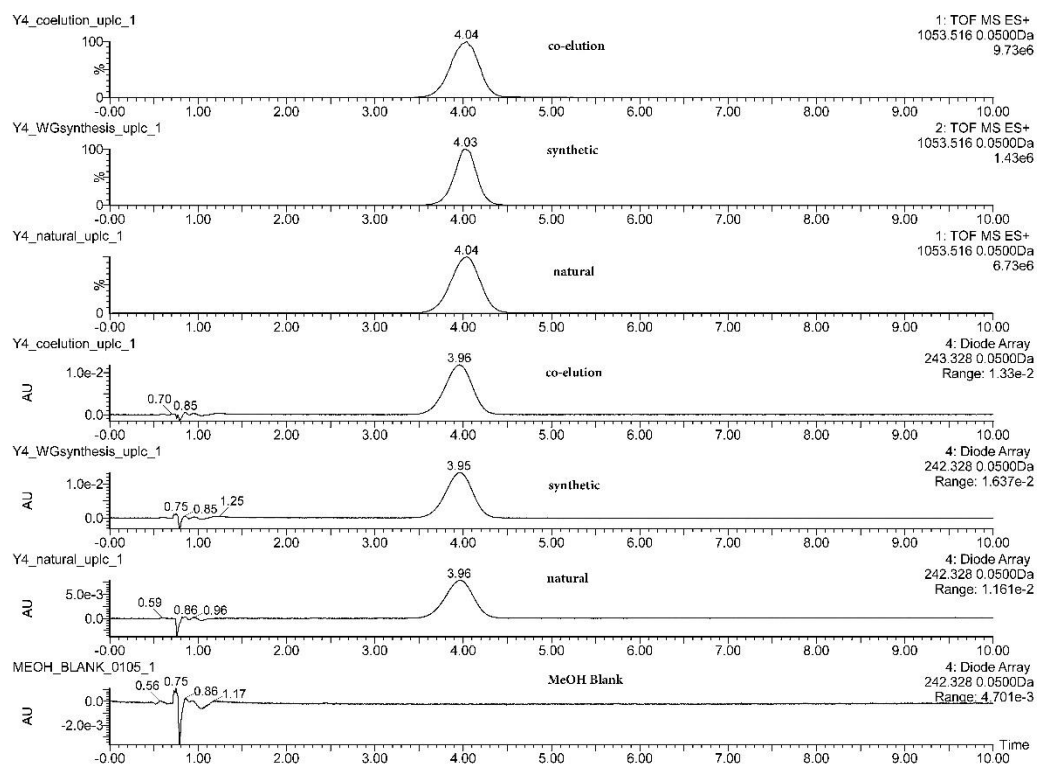

Figure S36. The UPLC-UV-MS chromatograms of **1** (natural, synthetic, and co-elution) in the condition of MeOH/water with 0.1% formic acid.

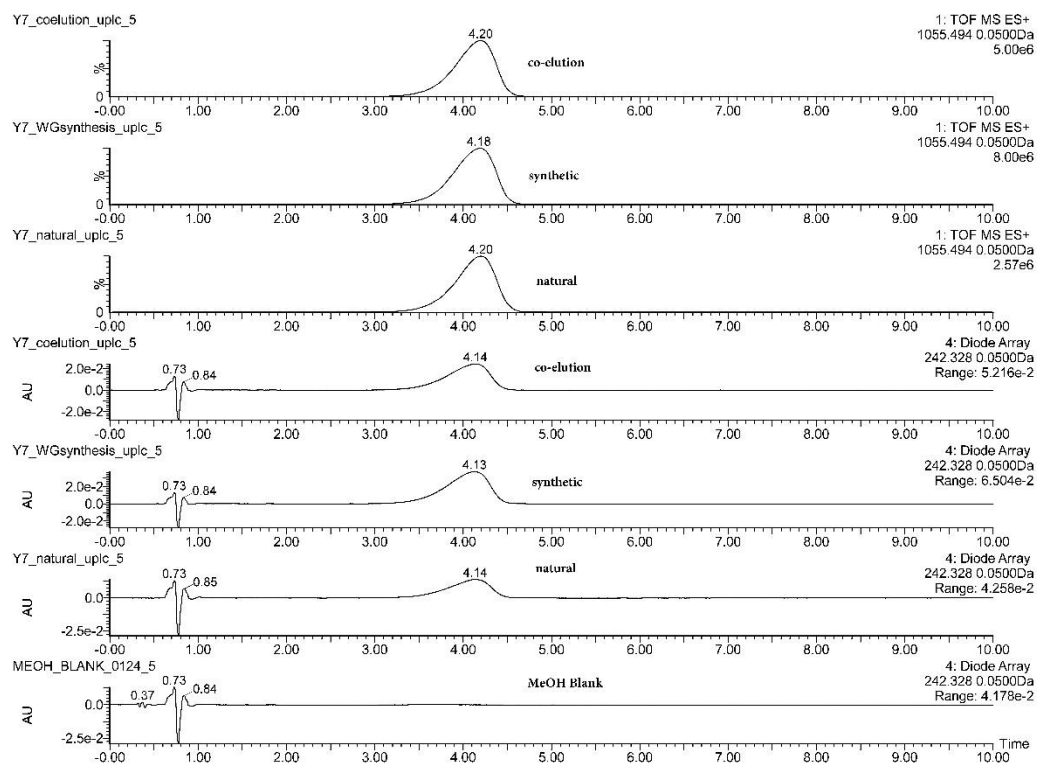

Figure S37. The UPLC-UV-MS chromatograms of **2** (natural, synthetic, and co-elution) in the condition of

ACN/ water with 0.1% formic acid.

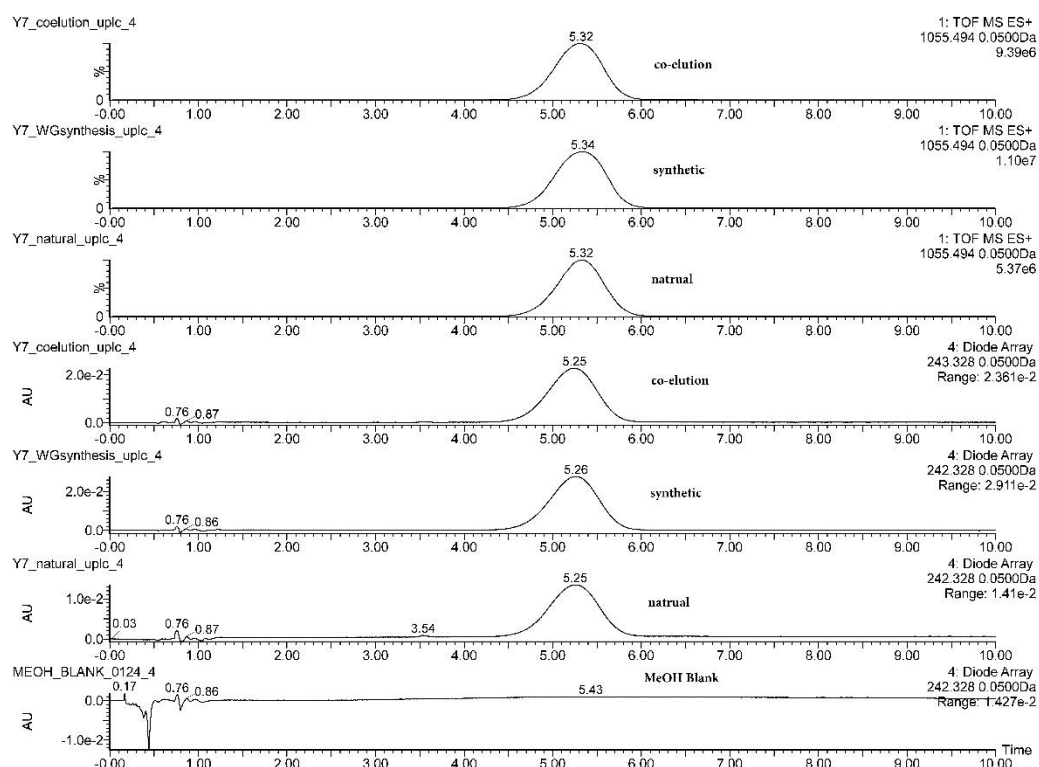

Figure S38. The UPLC-UV-MS chromatograms of **2** (natural, synthetic, and co-elution) in the condition of MeOH/ water with 0.1% formic acid.

Table S1. The physicochemical properties of natural-**1**, synthetic-**1**, natural-**2**, and synthetic-**2**.

|                                | natural-1                                                                                                                  | synthetic-1                                                                                                                | natural-2                                                                                                                  | synthetic-2                                                                                                             |
|--------------------------------|----------------------------------------------------------------------------------------------------------------------------|----------------------------------------------------------------------------------------------------------------------------|----------------------------------------------------------------------------------------------------------------------------|-------------------------------------------------------------------------------------------------------------------------|
| Properties                     | white amorphous powder                                                                                                     | white amorphous powder                                                                                                     | white amorphous powder                                                                                                     | white amorphous powder                                                                                                  |
| HRESIMS                        | 1053.5165 [M+H] <sup>+</sup><br>(calcd for C <sub>52</sub> H <sub>69</sub> N <sub>12</sub> O <sub>12</sub> ,<br>1053.5158) | 1053.5139 [M+H] <sup>+</sup><br>(calcd for C <sub>52</sub> H <sub>69</sub> N <sub>12</sub> O <sub>12</sub> ,<br>1053.5158) | 1055.4930 [M+H] <sup>+</sup> (calcd<br>for C <sub>51</sub> H <sub>67</sub> N <sub>12</sub> O <sub>13</sub> ,<br>1055.4951) | 1055.4944 [M+H] <sup>+</sup> (calcd<br>for C <sub>51</sub> H <sub>67</sub> N <sub>12</sub> O <sub>13</sub> , 1055.4951) |
| Molecular<br>formula           | C <sub>52</sub> H <sub>68</sub> N <sub>12</sub> O <sub>12</sub>                                                            | C <sub>52</sub> H <sub>68</sub> N <sub>12</sub> O <sub>12</sub>                                                            | C <sub>51</sub> H <sub>66</sub> N <sub>12</sub> O <sub>13</sub>                                                            | C <sub>51</sub> H <sub>66</sub> N <sub>12</sub> O <sub>13</sub>                                                         |
| IR cm <sup>-1</sup>            | 3375, 3303, 2968, 2936, 2877,<br>1742, 1644, 1517, 1492, 1459,<br>1408, 1180, 1126, 1014                                   | 3378, 3312, 2968, 2937, 2877,<br>1743, 1644, 1517, 1492, 1465,<br>1408, 1180, 1128, 1014                                   | 3351, 2918, 2850, 1740,<br>1637, 1578, 1538, 1492,<br>1465, 1409, 1260, 1097, 1025                                         | 3304, 2938, 2872, 1741, 1640,<br>1536, 1492, 1462, 1412, 1261,<br>1109, 1052                                            |
| UV(MeOH)                       | 242 (4.92), 317 (4.21)                                                                                                     | 242 (4.82), 324 (4.10)                                                                                                     | 241 (4.59), 323 (3.91)                                                                                                     | 242 (4.54), 317 (3.83)                                                                                                  |
| λ <sub>max</sub> (log ε)       |                                                                                                                            |                                                                                                                            |                                                                                                                            |                                                                                                                         |
| [α] <sub>D</sub> <sup>25</sup> | -110.0° (c 0.08, ACN)                                                                                                      | -110.0° (c 0.08, ACN)                                                                                                      | -152.0° (c 0.05, ACN)                                                                                                      | -155.0° (c 0.05, ACN)                                                                                                   |

Table S2. The antibacterial activities of synthetic-1 and synthetic-2 (MIC, µg/mL).

| Test organisms                      | Strain No.         | R/S <sup>b</sup> | synthetic-1 | synthetic-2 | Ec <sup>c</sup> | Lev <sup>c</sup> |
|-------------------------------------|--------------------|------------------|-------------|-------------|-----------------|------------------|
| <i>Staphylococcus epidermidis</i>   | ATCC 12228         | MSSE             | >64         | >32         | 0.25            | 0.25             |
|                                     | 18-1 <sup>a</sup>  | MRSE             | >64         | >32         | 0.5             | 4                |
|                                     | 17-13 <sup>a</sup> | MSSE             | >64         | >32         | 0.12            | 0.25             |
| <i>Staphylococcus aureus</i>        | ATCC 29213         | MSSA             | >64         | >32         | 0.12            | 0.5              |
|                                     | ATCC 33591         | MRSA             | >64         | >32         | 0.25            | 0.25             |
|                                     | 15 <sup>a</sup>    | MSSA             | >64         | >32         | 0.25            | 0.25             |
|                                     | 18-2 <sup>a</sup>  | MRSA             | >64         | >32         | 0.25            | >32              |
|                                     | 18-3 <sup>a</sup>  | MSSA             | >64         | >32         | 0.12            | 1                |
|                                     | ATCC 43300         | MRSA             | >64         | >32         | 0.12            | 0.5              |
|                                     | ATCC 700698        | MRSA,VISA        | >64         | >32         | 0.12            | 16               |
| <i>Enterococcus faecalis</i>        | ATCC 29212         | VSE              | >64         | >32         | 0.12            | 1                |
|                                     | ATCC 51299         | VRE              | >64         | >32         | 0.12            | 1                |
|                                     | ATCC 51575         | VRE              | >64         | >32         | 0.12            | 2                |
|                                     | 18-6 <sup>a</sup>  | VSE              | >64         | >32         | 0.25            | 2                |
| <i>Enterococcus faecium</i>         | ATCC 700221        | VRE              | >64         | >32         | 0.12            | >32              |
|                                     | 18-4 <sup>a</sup>  | VSE              | >64         | >32         | 0.25            | 4                |
|                                     | 15-6 <sup>a</sup>  | VRE              | >64         | >32         | 0.25            | >32              |
| <i>Escherichia coli</i>             | ATCC 25922         | ESBLs(-)         | >64         | >32         | 8               | 0.06             |
|                                     | ATCC 35218         | ESBLs(+)         | >64         | >32         | 1               | 0.06             |
|                                     | 1515 <sup>a</sup>  | ESBLs(-)         | >64         | >32         | 2               | 0.06             |
|                                     | 18-1 <sup>a</sup>  | ESBLs(-)         | >64         | >32         | 8               | 2                |
|                                     | 18-4 <sup>a</sup>  | ESBLs(+)         | >64         | >32         | 16              | 16               |
| <i>Klebsiella pneumoniae</i>        | ATCC 700603        | ESBLs(+)         | >64         | >32         | 32              | 1                |
|                                     | ATCC BAA-2146      | NDM-1(+)         | >64         | >32         | 16              | >32              |
|                                     | 7 <sup>a</sup>     | ESBLs(-)         | >64         | >32         | >32             | 0.12             |
|                                     | 18-2 <sup>a</sup>  | ESBLs(-)         | >64         | >32         | >32             | 0.25             |
|                                     | 18-8 <sup>a</sup>  | ESBLs(+)         | >64         | >32         | >32             | 1                |
| <i>Pseudomonas aeruginosa</i>       | ATCC 27853         |                  | >64         | >32         | >32             | 2                |
|                                     | PAO1               |                  | >64         | >32         | >32             | 1                |
| <i>Acinetobacter baumannii</i>      | ATCC 19606         |                  | >64         | >32         | 4               | 0.5              |
|                                     | 16-33 <sup>a</sup> | CRAB             | >64         | >32         | 8               | 4                |
| <i>Enterobacter cloacae</i>         | ATCC 43560         |                  | >64         | >32         | 4               | ≤0.03            |
| <i>Enterobacter aerogenes</i>       | ATCC 13048         |                  | >64         | >32         | 16              | 0.12             |
| <i>Serratia marcescens</i>          | ATCC 21074         |                  | >64         | >32         | >32             | 0.25             |
| <i>Proteus mirabilis</i>            | ATCC 49565         |                  | >64         | >32         | >32             | 0.12             |
| <i>Stenotrophomonas maltophilia</i> | ATCC 13636         |                  | >64         | >32         | 4               | 2                |
| <i>Shigella flexneri</i>            | ATCC 12022         |                  | >64         | >32         | 8               | ≤0.03            |

<sup>a</sup>clinical isolates; <sup>b</sup>drug-resistance; MSSE, methicillin-susceptible *S. epidermidis*; MRSE, methicillin-resistant *S. epidermidis*; MSSA, methicillin-susceptible *S. aureus*; MRSA, methicillin-resistant *S. aureus*; VISA, Vancomycin-intermediate *S. aureus*; VSE, Vancomycin-sensitive *Enterococcus*; VRE, Vancomycin-resistant *Enterococcus*; ESBLs, extended-spectrum beta-lactamases; NDM-1, New Delhi Metallo-beta-lactamase-1; CRAB, Carbapenem-resistant *A. baumannii*; <sup>c</sup>positive control, Ec, echinomycin, Lev, Levofloxacin.

Table S3 The cytotoxic activity of synthetic-1 and synthetic-2 against H460 lung cancer cells

|                       | synthetic-1 | synthetic-2 | <b>echinomycin</b> |
|-----------------------|-------------|-------------|--------------------|
| IC <sub>50</sub> (nM) | >1000       | >1000       | 1.5 ± 0.2          |

IC<sub>50</sub>, 50% inhibitory concentration (mean ± SD, n=3). They were determined by MTT assay following 72 h of drug treatment.
